# Supplementary material
Source: PubMed Central journal article supplement (PMC2674253)

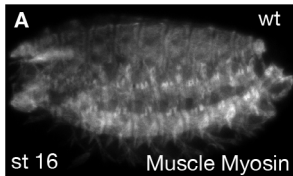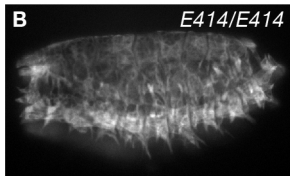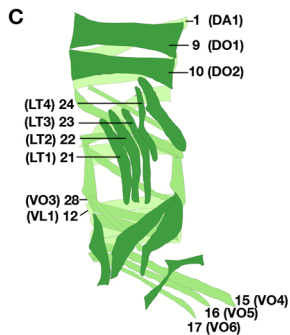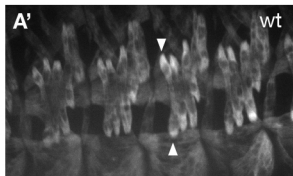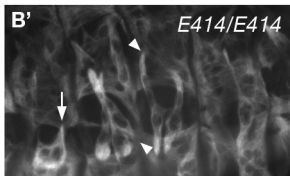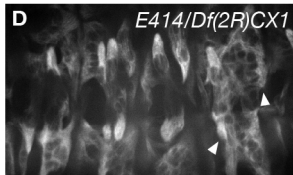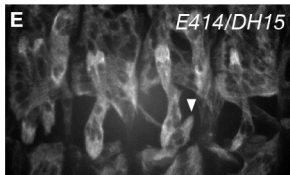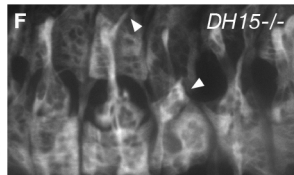

Supplement: dev.031823_1.pdf [file dev.031823_1.pdf]

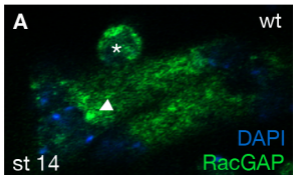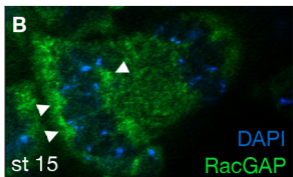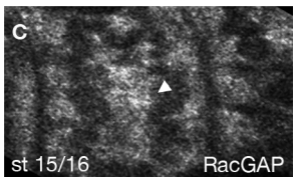

Supplement: dev.031823_2.pdf [file dev.031823_2.pdf]

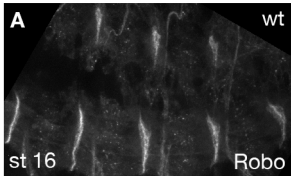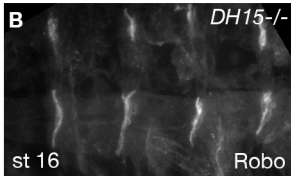

Supplement: dev.031823_3.pdf [file dev.031823_3.pdf]
